# Supplementary material for: Using single-particle ICP-MS for monitoring metal-containing particles in tap water
Source: Royal Society of Chemistry journal article supplement (doi:10.1039/c8ew00478a), 2018-01-01
Supplement: c8ew00478a1.pdf [file c8ew00478a1.pdf]

## Supporting Information

### Using single particle ICP-MS for monitoring metal-containing particles in tap waters

Arjun K. Venkatesan <sup>a,b,\*</sup>, Blanca T. Rodríguez <sup>c</sup>, Aurelie R. Marcotte <sup>c</sup>, Xiangyu Bi <sup>b</sup>, Jared Schoepf <sup>b</sup>, James F. Ranville <sup>d</sup>, Pierre Herckes <sup>c</sup>, Paul Westerhoff <sup>b</sup>

<sup>a</sup> Center for Clean Water Technology, Department of Civil Engineering, Stony Brook University, Stony Brook, New York, 11794, USA

<sup>b</sup> Nanosystems Engineering Research Center for Nanotechnology-Enabled Water Treatment, Arizona State University, School of Sustainable Engineering and the Built Environment, Arizona State University, Tempe, Arizona, 85287-3005, USA

<sup>c</sup> School of Molecular Sciences, Arizona State University, Tempe, Arizona, 85287-1604, USA

<sup>d</sup> Department of Chemistry and Geochemistry, Colorado School of Mines, Golden, Colorado, 80401, USA

\* Corresponding author phone: +1 631-632-1998; email: Arjun.Venkatesan@stonybrook.edu

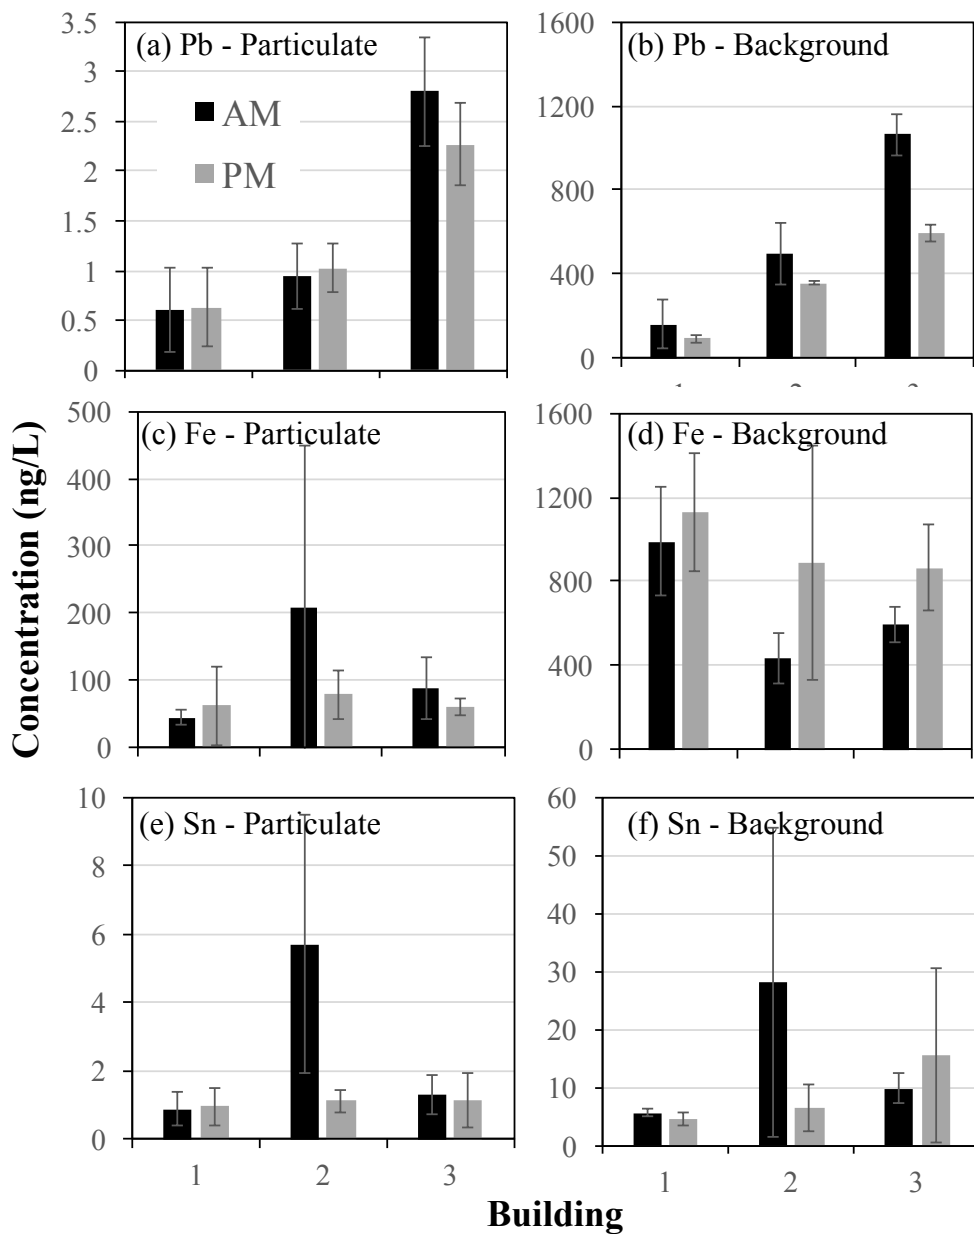

**Figure S1.** Average particulate (a – Pb; c – Fe; e – Sn) and background (b – Pb; d – Fe; f – Sn) elemental concentrations in the morning (AM) and afternoon (PM) samples of tap water collected from three buildings determined by spICP-MS. Error bars represent plus/minus one standard deviation.

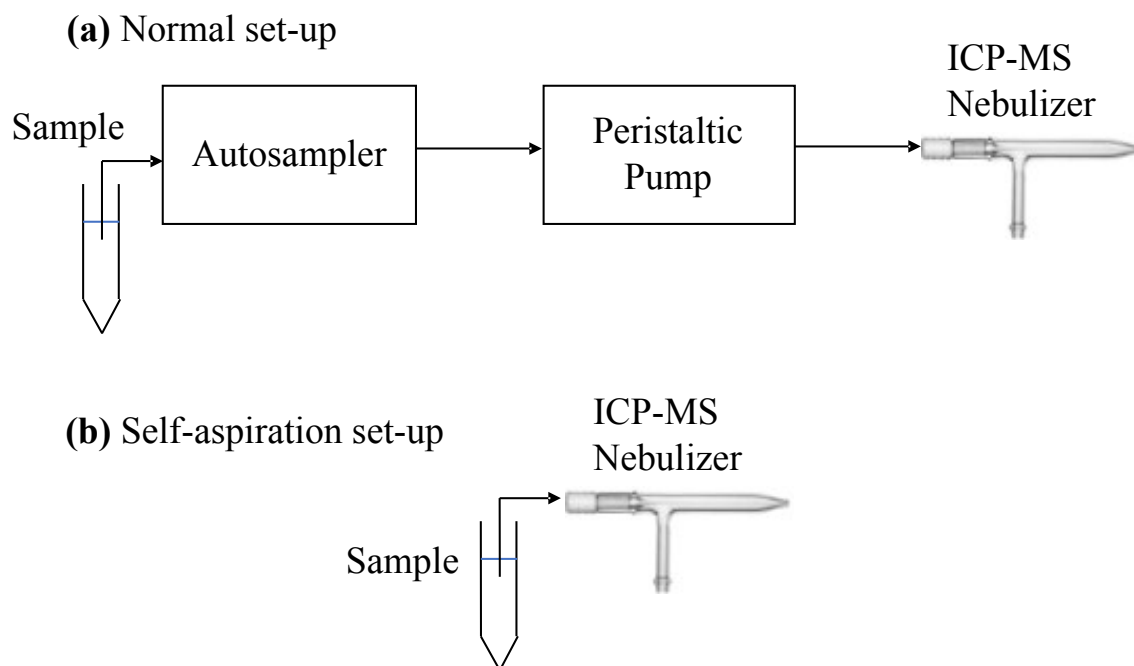

**Figure S2.** (a) Normal, and (b) modified self-aspiration set-up for spICP-MS analysis of Cu particles in tap water.

**Table S1.** Background and particulate lead concentrations measured by spICP-MS at three locations during four consecutive days.

Day 1 pm and Day 3 were not sampled on ASU campus because of limited access to the buildings.

| <i>Sample<br/>(Time)</i> | <i>Building 1</i>            |             |                               |             | <i>Building 2</i>            |             |                               |             | <i>Building 3</i>            |             |                               |             |
|--------------------------|------------------------------|-------------|-------------------------------|-------------|------------------------------|-------------|-------------------------------|-------------|------------------------------|-------------|-------------------------------|-------------|
|                          | <i>Background<br/>(ng/L)</i> |             | <i>Particulate<br/>(ng/L)</i> |             | <i>Background<br/>(ng/L)</i> |             | <i>Particulate<br/>(ng/L)</i> |             | <i>Background<br/>(ng/L)</i> |             | <i>Particulate<br/>(ng/L)</i> |             |
|                          | <i>F125</i>                  | <i>Bulk</i> | <i>F125</i>                   | <i>Bulk</i> | <i>F125</i>                  | <i>Bulk</i> | <i>F125</i>                   | <i>Bulk</i> | <i>F125</i>                  | <i>Bulk</i> | <i>F125</i>                   | <i>Bulk</i> |
| Day 1 - AM               | 476                          | 181         | 1.2                           | 0.85        | 476                          | 181         | 1.2                           | 0.85        | 1726                         | 213         | 3.9                           | 1.6         |
| Day 1- PM                | 152                          | 59.5        | 0.38                          | 0.35        |                              |             |                               |             |                              |             |                               |             |
| Day 2 - AM               | 178                          | 66.2        | 0.34                          | 0.18        | 668                          | 485         | 0.57                          | 0.67        | 2059                         | 254         | 4.8                           | 0.48        |
| Day 2 - PM               | 143                          | 47.2        | 0.58                          | 0.14        | 445                          | 270         | 0.7                           | 1           | 1062                         | 182         | 4.2                           | 0.45        |
| Day 3 - AM               | 134                          | 43.9        | 0.62                          | 0.23        |                              |             |                               |             |                              |             |                               |             |
| Day 3 - PM               | 90.4                         | 33.6        | 1.6                           | 0.11        |                              |             |                               |             |                              |             |                               |             |
| Day 4- AM                | 155                          | 41.8        | 1.4                           | 0.06        | 690                          | 492         | 1.1                           | 1.3         | 1857                         | 266         | 4.7                           | 1.3         |
| Day 4 - PM               | 143                          | 58          | 1.7                           | 0.17        | 449                          | 249         | 1                             | 1.4         | 959                          | 177         | 3.5                           | 0.91        |

**Table S2.** Background and particulate Fe concentrations measured by spICP-MS at three locations during four consecutive days. Day 1 pm and Day 3 were not sampled on ASU campus because of limited access to the buildings.

| <i>Sample<br/>(Time)</i> | <i>Building 1</i>            |             |                               |             | <i>Building 2</i>            |             |                               |             | <i>Building 3</i>            |             |                               |             |
|--------------------------|------------------------------|-------------|-------------------------------|-------------|------------------------------|-------------|-------------------------------|-------------|------------------------------|-------------|-------------------------------|-------------|
|                          | <i>Background<br/>(ng/L)</i> |             | <i>Particulate<br/>(ng/L)</i> |             | <i>Background<br/>(ng/L)</i> |             | <i>Particulate<br/>(ng/L)</i> |             | <i>Background<br/>(ng/L)</i> |             | <i>Particulate<br/>(ng/L)</i> |             |
|                          | <i>F125</i>                  | <i>Bulk</i> | <i>F125</i>                   | <i>Bulk</i> | <i>F125</i>                  | <i>Bulk</i> | <i>F125</i>                   | <i>Bulk</i> | <i>F125</i>                  | <i>Bulk</i> | <i>F125</i>                   | <i>Bulk</i> |
| <i>Day 1 - AM</i>        | 595                          | 764         | 54.3                          | 53.7        | 369                          | 402         | 890                           | 84.2        | 518                          | 662         | 84.2                          | 66.1        |
| <i>Day 1- PM</i>         | 960                          | 1163        | 34.4                          | 37.6        |                              |             |                               |             |                              |             |                               |             |
| <i>Day 2 - AM</i>        | 893                          | 1132        | 31                            | 61.7        | 361                          | 336         | 71.4                          | 66.1        | 528                          | 501         | 49.4                          | 53.6        |
| <i>Day 2 - PM</i>        | 766                          | 926         | 37                            | 58.9        | 488                          | 497         | 66.1                          | 142         | 829                          | 613         | 94.8                          | 33.5        |
| <i>Day 3 - AM</i>        | 923                          | 1179        | 34.1                          | 36.6        |                              |             |                               |             |                              |             |                               |             |
| <i>Day 3 - PM</i>        | 944                          | 1231        | 237                           | 25.8        |                              |             |                               |             |                              |             |                               |             |
| <i>Day 4 - AM</i>        | 1385                         | 1042        | 35.7                          | 47.1        | 684                          | 447         | 66.5                          | 61.4        | 612                          | 745         | 213                           | 63.4        |
| <i>Day 4 - PM</i>        | 1290                         | 1738        | 27.4                          | 36.7        | 1281                         | 1289        | 50.8                          | 54.4        | 931                          | 1088        | 67.8                          | 40.9        |

**Table S3.** Background and particulate Sn concentrations measured by spICP-MS at three locations during four consecutive days. Day 1 pm and Day 3 were not sampled on ASU campus because of limited access to the buildings.

| <i>Sample<br/>(Time)</i> | <i>Building 1</i>            |             |                               |             | <i>Building 2</i>            |             |                               |             | <i>Building 3</i>            |             |                               |             |
|--------------------------|------------------------------|-------------|-------------------------------|-------------|------------------------------|-------------|-------------------------------|-------------|------------------------------|-------------|-------------------------------|-------------|
|                          | <i>Background<br/>(ng/L)</i> |             | <i>Particulate<br/>(ng/L)</i> |             | <i>Background<br/>(ng/L)</i> |             | <i>Particulate<br/>(ng/L)</i> |             | <i>Background<br/>(ng/L)</i> |             | <i>Particulate<br/>(ng/L)</i> |             |
|                          | <i>F125</i>                  | <i>Bulk</i> | <i>F125</i>                   | <i>Bulk</i> | <i>F125</i>                  | <i>Bulk</i> | <i>F125</i>                   | <i>Bulk</i> | <i>F125</i>                  | <i>Bulk</i> | <i>F125</i>                   | <i>Bulk</i> |
| <i>Day 1 - AM</i>        | 7.9                          | 5.3         | 1.5                           | 1.3         | 9.4                          | 8           | 1.7                           | 1.8         | 8.9                          | 14.3        | 1.3                           | 1           |
| <i>Day 1- PM</i>         | 4.5                          | 5.2         | 0.81                          | 2           |                              |             |                               |             |                              |             |                               |             |
| <i>Day 2 - AM</i>        | 6                            | 5.3         | 0.91                          | 0.9         | 4.8                          | 106         | 2.4                           | 14.1        | 8.7                          | 6.2         | 1.2                           | 2.2         |
| <i>Day 2 - PM</i>        | 6.2                          | 4.2         | 0.84                          | 1.3         | 9.3                          | 9.5         | 0.96                          | 1.5         | 7                            | 45.2        | 1.7                           | 1.7         |
| <i>Day 3 - AM</i>        | 6.4                          | 4.7         | 0.29                          | 0.81        |                              |             |                               |             |                              |             |                               |             |
| <i>Day 3 - PM</i>        | 5.3                          | 3.8         | 1.2                           | 0.63        |                              |             |                               |             |                              |             |                               |             |
| <i>Day 4- AM</i>         | 4.9                          | 5.1         | 1.2                           | 0.13        | 7.4                          | 33.3        | 1                             | 13.2        | 7.7                          | 13.5        | 1.7                           | 0.38        |
| <i>Day 4 - PM</i>        | 2.7                          | 4.9         | 0.6                           | 0.11        | 3.1                          | 4.4         | 1.2                           | 0.81        | 5.5                          | 4.2         | 0.77                          | 0.32        |

**Table S4.** Background and particulate Cu concentrations measured using modified (direct self-aspiration) spICP-MS. Additional samples (n = 14) were collected from Building 2 to test the modified method. Only detects (n = 7) are reported below.

| <i>Sample</i> | <i>Background<br/>(<math>\mu\text{g/L}</math>)</i> | <i>Particulate<br/>(ng/L)</i> |
|---------------|----------------------------------------------------|-------------------------------|
| 1             | 8.8                                                | 14.9                          |
| 2             | 7.7                                                | 24.9                          |
| 3             | 28.1                                               | 110                           |
| 4             | 15                                                 | 37.7                          |
| 5             | 59                                                 | 136                           |
| 6             | 50.5                                               | 81.4                          |
| 7             | 52.2                                               | 76.3                          |
